# Supplementary material for: Identification of Potential Bioactive Ingredients and Mechanisms of the Guanxin Suhe Pill on Angina Pectoris by Integrating Network Pharmacology and Molecular Docking
Source: Evid Based Complement Alternat Med. 2021 Aug 11;2021:4280482. doi: 10.1155/2021/4280482 (PMC8373492; doi:10.1155/2021/4280482)
Supplement: Supplementary Materials — Supplementary Table 1: herb ingredient ID lists and qualified ingredient ID list. Supplementary Table 2: ingredient-target interaction lists of top targets. Supplementary Table 3: interaction scores of PTGS2 and ingredients. Supplementary Table 4: interaction scores of NOS2 and ingredients. [file 4280482.f1.zip]

Archive with 4 entries (4 files):
- 4280482.f1/Supplementary table 1.txt
- 4280482.f1/Supplementary table 2.txt
- 4280482.f1/supplementary table 3 (1).txt
- 4280482.f1/supplementary table 4 (1).txt
