# Supplementary material for: Identification of Potential Bioactive Ingredients and Mechanisms of the Guanxin Suhe Pill on Angina Pectoris by Integrating Network Pharmacology and Molecular Docking
Source: Evid Based Complement Alternat Med. 2021 Aug 11;2021:4280482. doi: 10.1155/2021/4280482 (PMC8373492; doi:10.1155/2021/4280482)
Supplement: Supplementary Materials — Supplementary Table 1: herb ingredient ID lists and qualified ingredient ID list. Supplementary Table 2: ingredient-target interaction lists of top targets. Supplementary Table 3: interaction scores of PTGS2 and ingredients. Supplementary Table 4: interaction scores of NOS2 and ingredients. [file 4280482.f1.zip › 4280482.f1/supplementary table 4 (1).txt]

receptor_name	TCMSP_id	Ingredient_id	Ingredient_name	scores
NOS2	MOL000006	HBIN033803	luteolin	-9.5
NOS2	MOL000098	HBIN041495	quercetin	-9.3
NOS2	MOL000422	HBIN031753	kaempferol	-8.9
NOS2	MOL000390	HBIN022577	daidzein	-8.9
NOS2	MOL000354	HBIN031114	isorhamnetin	-8.9
NOS2	MOL000008	HBIN016408	apigenin	-8.8
NOS2	MOL008498	HBIN047613	ursolic acid	-7.6
NOS2	MOL000991	HBIN020653	cinnamaldehyde	-6.5
NOS2	MOL003775	HBIN036022	musk ambrette	-6.2
NOS2	MOL001308	HBIN038026	oleic acid	-6.2
